# Supplementary material
Source: Springer Nature journal article supplement (http://www.springermedizin.de/resource/supplementary/12885_2008_1122_MOESM4_ESM.pdf/9471166)

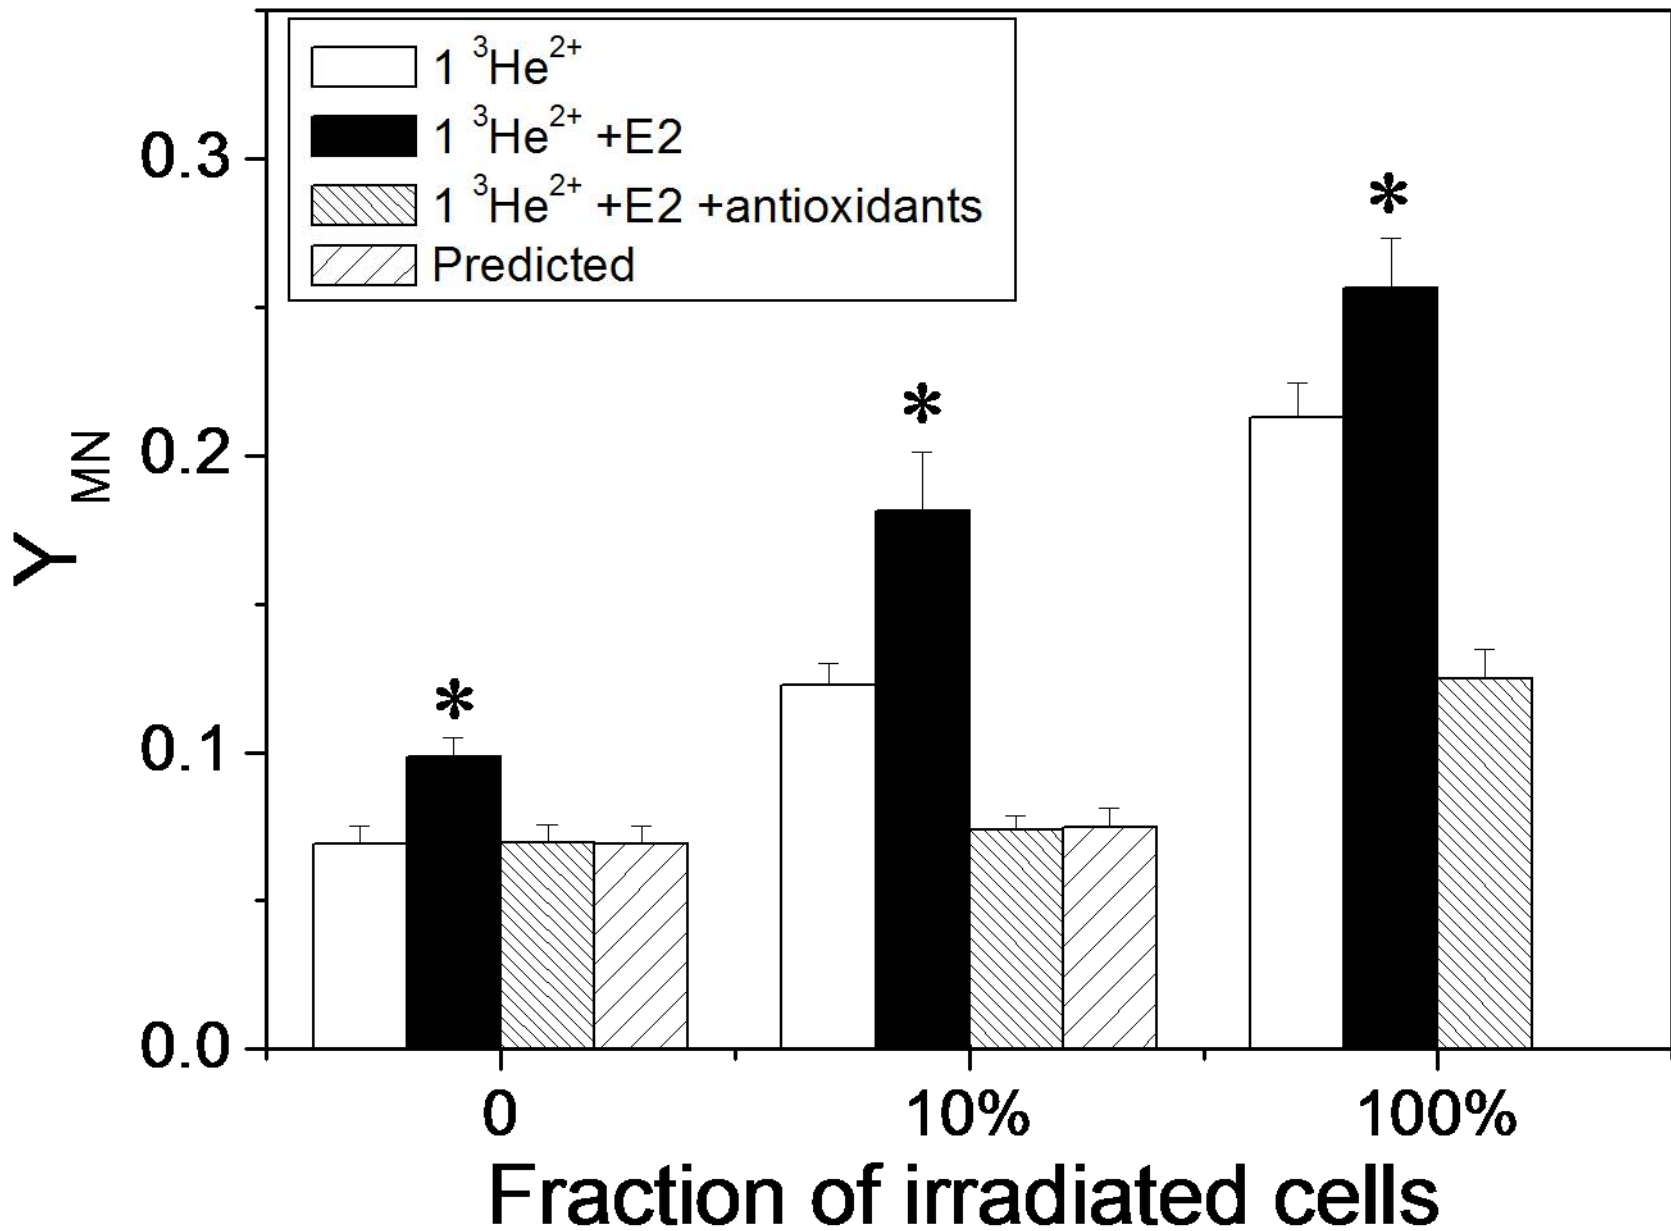

Supplement: MOESM4 [file 9471166]
